# Supplementary material for: Involvement of adiponectin in early stage of colorectal carcinogenesis
Source: PubMed Central journal article supplement (PMC4232655; doi:10.1186/1471-2407-14-811), 2014-11-05
Supplement: 12885_2013_4989_MOESM2_ESM.pdf [file 12885_2013_4989_MOESM2_ESM.pdf]

**Additional file 2 - Differences in AdipoR1 expression between patients with advanced adenoma and CRC in nine patients with carcinoma *in situ* that arose from advanced adenoma**

| No. of Sample | Density of AdipoR1 expression |      | <i>p</i> value |
|---------------|-------------------------------|------|----------------|
|               | Advanced adenoma              | CRC  |                |
| 1             | Moderate                      | None | 0.034          |
| 2             | Moderate                      | Mild |                |
| 3             | None                          | None |                |
| 4             | Moderate                      | Mild |                |
| 5             | None                          | None |                |
| 6             | None                          | None |                |
| 7             | Moderate                      | Mild |                |
| 8             | None                          | None |                |
| 9             | Mild                          | None |                |
